# Supplementary material for: Short-term starvation at low temperature prior to harvest does not impact the health and acute stress response of adult Atlantic salmon
Source: PeerJ. 2017 Apr 27;5:e3273. doi: 10.7717/peerj.3273 (PMC5410150; doi:10.7717/peerj.3273)
Supplement: Data S3 [file peerj-05-3273-s003.xlsx]

## Sheet: CT aver_Heart
Name	EF1a	IERG2	JUNB	TNF1a	iNOS	Ryr1
He Hov 0d F1	18.035	24.695	24.585	34.085	31.025	27.935
He Hov 0d F2	18.695	25.45	25.08	36.15	34.46	27.915
He Hov 0d F3	17.605	22.32	21.26	31.485	35.045	28.775
He Hov 0d F4	17.59	22.44	21.125	32.655	34.155	27.98
He Hov 0d F5	17.77	24.96	24.39	35.62	36.305	27.61
He Hov 0d F6	17.805	23.96	23.975	34.285	35.435	26.69
He Hov 0d F7	17.89	21.685	20.84	32.005	38.93	26.78
He Hov 0d F8	18.115	23.46	23.695	33.775	32.265	27.49
He Hov 0d F9	18.2	23.085	21.775	33.51	35.51	27.565
He Hov 0d F10	17.865	23.585	23.59	31.97	34.815	28.115
He Hov 0d F11	18.05	23.68	24.29	33.23	36.765	27.53
He Hov 0d F12	18.2	23.765	24.89	34.115	37.1	27.575
He Hov 0d F13	18.35	24.865	25.13	34.045	41.325	28.185
He Hov 0d F14	18.06	22.68	24.03	34.355	38.435	29.68
He Hov 0d F15	18.245	23.14	24.63	35.195	35.475	29.9
He Hov 3d F1	18.215	24.65	24.17	32.61	32.335	26.83
He Hov 3d F2	18.225	24.395	23.88	33.075	39.525	28.4
He Hov 3d F3	18.125	25.045	24.005	33.64	36.35	26.49
He Hov 3d F4	17.925	23.76	23.8	32.87	38.06	27.335
He Hov 3d F5	18.01	25.13	24.9	34.19	37.975	29.555
He Hov 3d F6	18.195	24.78	24.835	34.295	36.99	28.48
He Hov 3d F7	17.98	23.97	24.485	33.54	38.205	28.285
He Hov 3d F8	18.11	22.935	22.64	33.165	36.265	27.385
He Hov 3d F9	17.54	21.705	20.41	30.5	38.23	28.795
He Hov 3d F10	17.915	24.15	24.455	33.79	33.84	27.89
He Hov 3d F11	17.79	23.94	23.935	33.445	35.19	25.73
He Hov 3d F12	17.8	22.735	22.57	32.015	35.43	28.16
He Hov 3d F13	18.14	23.99	24.54	34.115	36.435	30.555
He Hov 3d F14	17.995	24.11	24.72	34.135	34.94	27.04
He Hov 3d F15	17.87	23.445	24.405	35.22	36.91	27.455
He Hov 7d F1	18.19	26.195	25.54	34.46	37.44	28.13
He Hov 7d F2	18.185	25.19	24.17	34.09	36.145	26.885
He Hov 7d F3	18.615	26.21	25.475	34.925	38.42	27.61
He Hov 7d F4	18.025	22.63	22.05	32.26	37.195	27.095
He Hov 7d F5	17.5	23.915	22.8	31.74	34.535	28.115
He Hov 7d F6	18.075	25.265	24.84	34.29	38.01	27.495
He Hov 7d F7	17.76	24.07	23.895	33.3	37.515	26.455
He Hov 7d F8	17.825	24.255	24.015	33.35	31.115	26.78
He Hov 7d F9	17.96	24.33	24.125	34.945	35.585	29.04
He Hov 7d F10	17.76	24.06	24.275	34.51	40.095	27.63
He Hov 7d F11	17.74	24.57	24.01	33.41	35.46	26.94
He Hov 7d F12	18.01	24.845	24.335	34.395	35.61	28.995
He Hov 7d F13	18.115	24.135	24.125	34.885	40.37	28.74
He Hov 7d F14	17.94	24.725	24.19	34.615	38.775	28.07
He Hov 7d F15	17.87	24.84	24.715	34.65	35.845	28.205
He Hov 14d F1	18.005	22.615	23.715	35.04	36.255	27.795
He Hov 14d F2	17.77	23.11	22.75	33.49	34.895	27.045
He Hov 14D F3	17.88	22.48	22.985	33.075	36.23	27.91
He Hov 14d F4	17.8	23.5	23.155	33.68	36.33	30.41
He Hov 14d F5	17.775	22.28	21.905	33.055	36.165	27.18
He Hov 14d F6	17.875	22.52	22.485	32.87	34.295	28.245
He Hov 14d F7	17.885	21.66	21.9	32.43	41.685	26.76
He Hov 14d F8	17.555	23.305	23.725	33.08	33.665	28.08
He Hov 14d F9	17.795	22.265	23.2	33.145	35.6	27.125
He Hov 14d F10	17.74	24.43	24.72	34.535	36.41	27.575
He Hov 14d F11	17.745	21.485	21.055	31.715	35.905	26.79
He Hov 14d F12	17.8	22.45	23.135	33.52	33.295	27.035
He Hov 14d F13	17.715	22.17	22.12	33.14	39.735	29.165
He Hov 14d F14	17.255	23.19	23.195	31.855	36.34	27.885
He Hov 14d F15	17.95	21.89	22.75	32.62	38.945	27.97
He Stress 0d F1	17.735	21.645	22.105	32.125	39.04	26.275
He Stress 0d F2	17.895	21.975	22.575	33.36	38.365	26.535
He Stress 0d F3	17.695	21.56	20.905	31.41	34.685	27.33
He Stress 0d F4	17.685	21.535	21.78	32.02	33.045	28.01
He Stress 0d F5	17.595	22.53	23.75	32.86	37.525	27.84
He Stress 0d F6	17.655	22.78	22.86	31.41	35.07	27.885
He Stress 0d F7	17.785	21.63	22	32.825	38.725	27.53
He Stress 0d F8	17.175	21.79	22.425	31.055	40.12	28.19
He Stress 0d F9	17.475	21.22	20.55	30.495	30.385	28.005
He Stress 0d F10	17.535	20.13	20.3	33.73	35.89	29.62
He Stress 0d F11	17.62	21.145	21.22	33.495	40.925	29.53
He Stress 0d F12	17.82	20.745	21.06	33.96	39.18	27.67
He Stress 0d F13	17.67	21.36	22.14	33.56	37.14	28.625
He Stress 0d F14	17.605	20.895	21.74	32.725	38.395	26.715
He Stress 0d F15	17.46	21.305	21.565	32.155	41.12	26.725
He Stress 14d F1	17.955	21.7	22.155	32.775	37.98	28.45
He Stress 14d F2	17.805	21.25	21.425	32.485	38.425	27.36
He Stress 14d F3	17.72	21.58	22.22	32.945	36.145	27.265
He Stress 14d F4	17.85	21.285	22.3	33.01	35.72	26.52
He Stress 14d F5	17.69	20.58	21.175	33.42	36.58	27.42
He Stress 14d F6	17.165	20.955	19.84	30.65	36.105	27.835
He Stress 14d F7	17.505	20.835	20.24	32.045	32.68	26.285
He Stress 14d F8	17.815	21.255	21.96	32.785	38.32	28.935
He Stress 14d F9	18.105	22.33	23.145	34.08	38.95	26.24
He Srtess 14d F10	17.59	21.185	21.48	32.85	35.01	27.16
He Stress 14d F11	17.805	21.53	22.225	33.94	36.61	28.13
He Stress 14d F12	17.86	20.645	21.045	33.645	38.02	27.14
He Stress 14d F13	17.95	21.185	21.095	32.71	36.59
He Stress 14d F14	17.615	20.835	21.175		37.74	28.11
He Stress 14d F15	17.605	20.915	21.755	32.185	38.615	26.445

## Sheet: Calc_Heart
Enter sample names, norm gene values and efficienty!																					Enter control names, norm gene values and efficienty!
Gene name	sample	CT Norm	Efficiency																		sample	CT Norm
EF1a+18S av	He Hov 0d F1	18.035	1			fill in sample values and gene names															He Hov 0d F1	18.035
	He Hov 0d F2	18.695				fill in control values															He Hov 0d F2	18.695
	He Hov 0d F3	17.605																			He Hov 0d F3	17.605
	He Hov 0d F4	17.59																			He Hov 0d F4	17.59
	He Hov 0d F5	17.77																			He Hov 0d F5	17.77
	He Hov 0d F6	17.805																			He Hov 0d F6	17.805
	He Hov 0d F7	17.89																			He Hov 0d F7	17.89
	He Hov 0d F8	18.115																			He Hov 0d F8	18.115
	He Hov 0d F9	18.2																			He Hov 0d F9	18.2
	He Hov 0d F10	17.865																			He Hov 0d F10	17.865
	He Hov 0d F11	18.05																			He Hov 0d F11	18.05
	He Hov 0d F12	18.2																			He Hov 0d F12	18.2
	He Hov 0d F13	18.35																			He Hov 0d F13	18.35
	He Hov 0d F14	18.06																			He Hov 0d F14	18.06
	He Hov 0d F15	18.245																			He Hov 0d F15	18.245
	He Hov 3d F1	18.215
	He Hov 3d F2	18.225
	He Hov 3d F3	18.125
	He Hov 3d F4	17.925
	He Hov 3d F5	18.01
	He Hov 3d F6	18.195
	He Hov 3d F7	17.98
	He Hov 3d F8	18.11
	He Hov 3d F9	17.54
	He Hov 3d F10	17.915
	He Hov 3d F11	17.79
	He Hov 3d F12	17.8
	He Hov 3d F13	18.14
	He Hov 3d F14	17.995
	He Hov 3d F15	17.87
	He Hov 7d F1	18.19
	He Hov 7d F2	18.185
	He Hov 7d F3	18.615
	He Hov 7d F4	18.025
	He Hov 7d F5	17.5
	He Hov 7d F6	18.075
	He Hov 7d F7	17.76
	He Hov 7d F8	17.825
	He Hov 7d F9	17.96
	He Hov 7d F10	17.76
	He Hov 7d F11	17.74
	He Hov 7d F12	18.01
	He Hov 7d F13	18.115
	He Hov 7d F14	17.94
	He Hov 7d F15	17.87
	He Hov 14d F1	18.005
	He Hov 14d F2	17.77
	He Hov 14D F3	17.88
	He Hov 14d F4	17.8
	He Hov 14d F5	17.775
	He Hov 14d F6	17.875
	He Hov 14d F7	17.885
	He Hov 14d F8	17.555
	He Hov 14d F9	17.795
	He Hov 14d F10	17.74
	He Hov 14d F11	17.745
	He Hov 14d F12	17.8
	He Hov 14d F13	17.715
	He Hov 14d F14	17.255
	He Hov 14d F15	17.95
	He Stress 0d F1	17.735
	He Stress 0d F2	17.895
	He Stress 0d F3	17.695
	He Stress 0d F4	17.685
	He Stress 0d F5	17.595
	He Stress 0d F6	17.655
	He Stress 0d F7	17.785
	He Stress 0d F8	17.175
	He Stress 0d F9	17.475
	He Stress 0d F10	17.535
	He Stress 0d F11	17.62
	He Stress 0d F12	17.82
	He Stress 0d F13	17.67
	He Stress 0d F14	17.605
	He Stress 0d F15	17.46
	He Stress 14d F1	17.955
	He Stress 14d F2	17.805
	He Stress 14d F3	17.72
	He Stress 14d F4	17.85
	He Stress 14d F5	17.69
	He Stress 14d F6	17.165
	He Stress 14d F7	17.505
	He Stress 14d F8	17.815
	He Stress 14d F9	18.105
	He Srtess 14d F10	17.59
	He Stress 14d F11	17.805
	He Stress 14d F12	17.86
	He Stress 14d F13	17.95
	He Stress 14d F14	17.615
	He Stress 14d F15	17.605
																					Norm Average	18.0317
Enter genes and efficienties!
genes:	IERG2	JUNB	TNF1a	iNOS	Ryr1
E %	1	1	1	1	1
Enter values!	CT-values:																				Enter values!	CT-values:
sample	IERG2	JUNB	TNF1a	iNOS	Ryr1																sample	IERG2	JUNB	TNF1a	iNOS	Ryr1
He Hov 0d F1	24.695	24.585	34.085	31.025	27.935																He Hov 0d F1	24.695	24.585	34.085	31.025	27.935
He Hov 0d F2	25.45	25.08	36.15	34.46	27.915																He Hov 0d F2	25.45	25.08	36.15	34.46	27.915
He Hov 0d F3	22.32	21.26	31.485	35.045	28.775																He Hov 0d F3	22.32	21.26	31.485	35.045	28.775
He Hov 0d F4	22.44	21.125	32.655	34.155	27.98																He Hov 0d F4	22.44	21.125	32.655	34.155	27.98
He Hov 0d F5	24.96	24.39	35.62	36.305	27.61																He Hov 0d F5	24.96	24.39	35.62	36.305	27.61
He Hov 0d F6	23.96	23.975	34.285	35.435	26.69																He Hov 0d F6	23.96	23.975	34.285	35.435	26.69
He Hov 0d F7	21.685	20.84	32.005	38.93	26.78																He Hov 0d F7	21.685	20.84	32.005	38.93	26.78
He Hov 0d F8	23.46	23.695	33.775	32.265	27.49																He Hov 0d F8	23.46	23.695	33.775	32.265	27.49
He Hov 0d F9	23.085	21.775	33.51	35.51	27.565																He Hov 0d F9	23.085	21.775	33.51	35.51	27.565
He Hov 0d F10	23.585	23.59	31.97	34.815	28.115																He Hov 0d F10	23.585	23.59	31.97	34.815	28.115
He Hov 0d F11	23.68	24.29	33.23	36.765	27.53																He Hov 0d F11	23.68	24.29	33.23	36.765	27.53
He Hov 0d F12	23.765	24.89	34.115	37.1	27.575																He Hov 0d F12	23.765	24.89	34.115	37.1	27.575
He Hov 0d F13	24.865	25.13	34.045	41.325	28.185																He Hov 0d F13	24.865	25.13	34.045	41.325	28.185
He Hov 0d F14	22.68	24.03	34.355	38.435	29.68																He Hov 0d F14	22.68	24.03	34.355	38.435	29.68
He Hov 0d F15	23.14	24.63	35.195	35.475	29.9																He Hov 0d F15	23.14	24.63	35.195	35.475	29.9
He Hov 3d F1	24.65	24.17	32.61	32.335	26.83
He Hov 3d F2	24.395	23.88	33.075	39.525	28.4
He Hov 3d F3	25.045	24.005	33.64	36.35	26.49
He Hov 3d F4	23.76	23.8	32.87	38.06	27.335
He Hov 3d F5	25.13	24.9	34.19	37.975	29.555
He Hov 3d F6	24.78	24.835	34.295	36.99	28.48
He Hov 3d F7	23.97	24.485	33.54	38.205	28.285
He Hov 3d F8	22.935	22.64	33.165	36.265	27.385
He Hov 3d F9	21.705	20.41	30.5	38.23	28.795
He Hov 3d F10	24.15	24.455	33.79	33.84	27.89
He Hov 3d F11	23.94	23.935	33.445	35.19	25.73
He Hov 3d F12	22.735	22.57	32.015	35.43	28.16
He Hov 3d F13	23.99	24.54	34.115	36.435	30.555
He Hov 3d F14	24.11	24.72	34.135	34.94	27.04
He Hov 3d F15	23.445	24.405	35.22	36.91	27.455
He Hov 7d F1	26.195	25.54	34.46	37.44	28.13
He Hov 7d F2	25.19	24.17	34.09	36.145	26.885
He Hov 7d F3	26.21	25.475	34.925	38.42	27.61
He Hov 7d F4	22.63	22.05	32.26	37.195	27.095
He Hov 7d F5	23.915	22.8	31.74	34.535	28.115
He Hov 7d F6	25.265	24.84	34.29	38.01	27.495
He Hov 7d F7	24.07	23.895	33.3	37.515	26.455
He Hov 7d F8	24.255	24.015	33.35	31.115	26.78
He Hov 7d F9	24.33	24.125	34.945	35.585	29.04
He Hov 7d F10	24.06	24.275	34.51	40.095	27.63
He Hov 7d F11	24.57	24.01	33.41	35.46	26.94
He Hov 7d F12	24.845	24.335	34.395	35.61	28.995
He Hov 7d F13	24.135	24.125	34.885	40.37	28.74
He Hov 7d F14	24.725	24.19	34.615	38.775	28.07
He Hov 7d F15	24.84	24.715	34.65	35.845	28.205
He Hov 14d F1	22.615	23.715	35.04	36.255	27.795
He Hov 14d F2	23.11	22.75	33.49	34.895	27.045
He Hov 14D F3	22.48	22.985	33.075	36.23	27.91
He Hov 14d F4	23.5	23.155	33.68	36.33	30.41
He Hov 14d F5	22.28	21.905	33.055	36.165	27.18
He Hov 14d F6	22.52	22.485	32.87	34.295	28.245
He Hov 14d F7	21.66	21.9	32.43	41.685	26.76
He Hov 14d F8	23.305	23.725	33.08	33.665	28.08
He Hov 14d F9	22.265	23.2	33.145	35.6	27.125
He Hov 14d F10	24.43	24.72	34.535	36.41	27.575
He Hov 14d F11	21.485	21.055	31.715	35.905	26.79
He Hov 14d F12	22.45	23.135	33.52	33.295	27.035
He Hov 14d F13	22.17	22.12	33.14	39.735	29.165
He Hov 14d F14	23.19	23.195	31.855	36.34	27.885
He Hov 14d F15	21.89	22.75	32.62	38.945	27.97
He Stress 0d F1	21.645	22.105	32.125	39.04	26.275
He Stress 0d F2	21.975	22.575	33.36	38.365	26.535
He Stress 0d F3	21.56	20.905	31.41	34.685	27.33
He Stress 0d F4	21.535	21.78	32.02	33.045	28.01
He Stress 0d F5	22.53	23.75	32.86	37.525	27.84
He Stress 0d F6	22.78	22.86	31.41	35.07	27.885
He Stress 0d F7	21.63	22	32.825	38.725	27.53
He Stress 0d F8	21.79	22.425	31.055	40.12	28.19
He Stress 0d F9	21.22	20.55	30.495	30.385	28.005
He Stress 0d F10	20.13	20.3	33.73	35.89	29.62
He Stress 0d F11	21.145	21.22	33.495	40.925	29.53
He Stress 0d F12	20.745	21.06	33.96	39.18	27.67
He Stress 0d F13	21.36	22.14	33.56	37.14	28.625
He Stress 0d F14	20.895	21.74	32.725	38.395	26.715
He Stress 0d F15	21.305	21.565	32.155	41.12	26.725
He Stress 14d F1	21.7	22.155	32.775	37.98	28.45
He Stress 14d F2	21.25	21.425	32.485	38.425	27.36
He Stress 14d F3	21.58	22.22	32.945	36.145	27.265
He Stress 14d F4	21.285	22.3	33.01	35.72	26.52
He Stress 14d F5	20.58	21.175	33.42	36.58	27.42
He Stress 14d F6	20.955	19.84	30.65	36.105	27.835
He Stress 14d F7	20.835	20.24	32.045	32.68	26.285
He Stress 14d F8	21.255	21.96	32.785	38.32	28.935
He Stress 14d F9	22.33	23.145	34.08	38.95	26.24
He Srtess 14d F10	21.185	21.48	32.85	35.01	27.16
He Stress 14d F11	21.53	22.225	33.94	36.61	28.13
He Stress 14d F12	20.645	21.045	33.645	38.02	27.14
He Stress 14d F13	21.185	21.095	32.71	36.59
He Stress 14d F14	20.835	21.175		37.74	28.11
He Stress 14d F15	20.915	21.755	32.185	38.615	26.445
																					Average control	23.5847	23.5523	33.7653	35.803	27.9817
normalized samples	CT-values:																				normalized control	CT-values:
sample	IERG2	JUNB	TNF1a	iNOS	Ryr1																sample	IERG2	JUNB	TNF1a	iNOS	Ryr1
He Hov 0d F1	6.66	6.55	16.05	12.99	9.9																He Hov 0d F1	6.66	6.55	16.05	12.99	9.9
He Hov 0d F2	6.755	6.385	17.455	15.765	9.22																He Hov 0d F2	6.755	6.385	17.455	15.765	9.22
He Hov 0d F3	4.715	3.655	13.88	17.44	11.17																He Hov 0d F3	4.715	3.655	13.88	17.44	11.17
He Hov 0d F4	4.85	3.535	15.065	16.565	10.39																He Hov 0d F4	4.85	3.535	15.065	16.565	10.39
He Hov 0d F5	7.19	6.62	17.85	18.535	9.84																He Hov 0d F5	7.19	6.62	17.85	18.535	9.84
He Hov 0d F6	6.155	6.17	16.48	17.63	8.885																He Hov 0d F6	6.155	6.17	16.48	17.63	8.885
He Hov 0d F7	3.795	2.95	14.115	21.04	8.89																He Hov 0d F7	3.795	2.95	14.115	21.04	8.89
He Hov 0d F8	5.345	5.58	15.66	14.15	9.375																He Hov 0d F8	5.345	5.58	15.66	14.15	9.375
He Hov 0d F9	4.885	3.575	15.31	17.31	9.365																He Hov 0d F9	4.885	3.575	15.31	17.31	9.365
He Hov 0d F10	5.72	5.725	14.105	16.95	10.25																He Hov 0d F10	5.72	5.725	14.105	16.95	10.25
He Hov 0d F11	5.63	6.24	15.18	18.715	9.48																He Hov 0d F11	5.63	6.24	15.18	18.715	9.48
He Hov 0d F12	5.565	6.69	15.915	18.9	9.375																He Hov 0d F12	5.565	6.69	15.915	18.9	9.375
He Hov 0d F13	6.515	6.78	15.695	22.975	9.835																He Hov 0d F13	6.515	6.78	15.695	22.975	9.835
He Hov 0d F14	4.62	5.97	16.295	20.375	11.62																He Hov 0d F14	4.62	5.97	16.295	20.375	11.62
He Hov 0d F15	4.895	6.385	16.95	17.23	11.655																He Hov 0d F15	4.895	6.385	16.95	17.23	11.655
He Hov 3d F1	6.435	5.955	14.395	14.12	8.615
He Hov 3d F2	6.17	5.655	14.85	21.3	10.175
He Hov 3d F3	6.92	5.88	15.515	18.225	8.365
He Hov 3d F4	5.835	5.875	14.945	20.135	9.41
He Hov 3d F5	7.12	6.89	16.18	19.965	11.545
He Hov 3d F6	6.585	6.64	16.1	18.795	10.285
He Hov 3d F7	5.99	6.505	15.56	20.225	10.305
He Hov 3d F8	4.825	4.53	15.055	18.155	9.275
He Hov 3d F9	4.165	2.87	12.96	20.69	11.255
He Hov 3d F10	6.235	6.54	15.875	15.925	9.975
He Hov 3d F11	6.15	6.145	15.655	17.4	7.94
He Hov 3d F12	4.935	4.77	14.215	17.63	10.36
He Hov 3d F13	5.85	6.4	15.975	18.295	12.415
He Hov 3d F14	6.115	6.725	16.14	16.945	9.045
He Hov 3d F15	5.575	6.535	17.35	19.04	9.585
He Hov 7d F1	8.005	7.35	16.27	19.25	9.94
He Hov 7d F2	7.005	5.985	15.905	17.96	8.7
He Hov 7d F3	7.595	6.86	16.31	19.805	8.995
He Hov 7d F4	4.605	4.025	14.235	19.17	9.07
He Hov 7d F5	6.415	5.3	14.24	17.035	10.615
He Hov 7d F6	7.19	6.765	16.215	19.935	9.42
He Hov 7d F7	6.31	6.135	15.54	19.755	8.695
He Hov 7d F8	6.43	6.19	15.525	13.29	8.955
He Hov 7d F9	6.37	6.165	16.985	17.625	11.08
He Hov 7d F10	6.3	6.515	16.75	22.335	9.87
He Hov 7d F11	6.83	6.27	15.67	17.72	9.2
He Hov 7d F12	6.835	6.325	16.385	17.6	10.985
He Hov 7d F13	6.02	6.01	16.77	22.255	10.625
He Hov 7d F14	6.785	6.25	16.675	20.835	10.13
He Hov 7d F15	6.97	6.845	16.78	17.975	10.335
He Hov 14d F1	4.61	5.71	17.035	18.25	9.79
He Hov 14d F2	5.34	4.98	15.72	17.125	9.275
He Hov 14D F3	4.6	5.105	15.195	18.35	10.03
He Hov 14d F4	5.7	5.355	15.88	18.53	12.61
He Hov 14d F5	4.505	4.13	15.28	18.39	9.405
He Hov 14d F6	4.645	4.61	14.995	16.42	10.37
He Hov 14d F7	3.775	4.015	14.545	23.8	8.875
He Hov 14d F8	5.75	6.17	15.525	16.11	10.525
He Hov 14d F9	4.47	5.405	15.35	17.805	9.33
He Hov 14d F10	6.69	6.98	16.795	18.67	9.835
He Hov 14d F11	3.74	3.31	13.97	18.16	9.045
He Hov 14d F12	4.65	5.335	15.72	15.495	9.235
He Hov 14d F13	4.455	4.405	15.425	22.02	11.45
He Hov 14d F14	5.935	5.94	14.6	19.085	10.63
He Hov 14d F15	3.94	4.8	14.67	20.995	10.02
He Stress 0d F1	3.91	4.37	14.39	21.305	8.54
He Stress 0d F2	4.08	4.68	15.465	20.47	8.64
He Stress 0d F3	3.865	3.21	13.715	16.99	9.635
He Stress 0d F4	3.85	4.095	14.335	15.36	10.325
He Stress 0d F5	4.935	6.155	15.265	19.93	10.245
He Stress 0d F6	5.125	5.205	13.755	17.415	10.23
He Stress 0d F7	3.845	4.215	15.04	20.94	9.745
He Stress 0d F8	4.615	5.25	13.88	22.945	11.015
He Stress 0d F9	3.745	3.075	13.02	12.91	10.53
He Stress 0d F10	2.595	2.765	16.195	18.355	12.085
He Stress 0d F11	3.525	3.6	15.875	23.305	11.91
He Stress 0d F12	2.925	3.24	16.14	21.36	9.85
He Stress 0d F13	3.69	4.47	15.89	19.47	10.955
He Stress 0d F14	3.29	4.135	15.12	20.79	9.11
He Stress 0d F15	3.845	4.105	14.695	23.66	9.265
He Stress 14d F1	3.745	4.2	14.82	20.025	10.495
He Stress 14d F2	3.445	3.62	14.68	20.62	9.555
He Stress 14d F3	3.86	4.5	15.225	18.425	9.545
He Stress 14d F4	3.435	4.45	15.16	17.87	8.67
He Stress 14d F5	2.89	3.485	15.73	18.89	9.73
He Stress 14d F6	3.79	2.675	13.485	18.94	10.67
He Stress 14d F7	3.33	2.735	14.54	15.175	8.78
He Stress 14d F8	3.44	4.145	14.97	20.505	11.12
He Stress 14d F9	4.225	5.04	15.975	20.845	8.135
He Srtess 14d F10	3.595	3.89	15.26	17.42	9.57
He Stress 14d F11	3.725	4.42	16.135	18.805	10.325
He Stress 14d F12	2.785	3.185	15.785	20.16	9.28
He Stress 14d F13	3.235	3.145	14.76	18.64
He Stress 14d F14	3.22	3.56		20.125	10.495
He Stress 14d F15	3.31	4.15	14.58	21.01	8.84
ΔΔCt values																					Average control	5.553	5.52067	15.7337	17.7713	9.95
sample	IERG2	JUNB	TNF1a	iNOS	Ryr1
He Hov 0d F1	1.107	1.02933	0.316333	-4.78133	-0.05
He Hov 0d F2	1.202	0.864333	1.72133	-2.00633	-0.73
He Hov 0d F3	-0.838	-1.86567	-1.85367	-0.331333	1.22
He Hov 0d F4	-0.703	-1.98567	-0.668667	-1.20633	0.44
He Hov 0d F5	1.637	1.09933	2.11633	0.763667	-0.11
He Hov 0d F6	0.602	0.649333	0.746333	-0.141333	-1.065
He Hov 0d F7	-1.758	-2.57067	-1.61867	3.26867	-1.06
He Hov 0d F8	-0.208	0.0593333	-0.0736667	-3.62133	-0.575
He Hov 0d F9	-0.668	-1.94567	-0.423667	-0.461333	-0.585
He Hov 0d F10	0.167	0.204333	-1.62867	-0.821333	0.3
He Hov 0d F11	0.077	0.719333	-0.553667	0.943667	-0.47
He Hov 0d F12	0.012	1.16933	0.181333	1.12867	-0.575
He Hov 0d F13	0.962	1.25933	-0.0386667	5.20367	-0.115
He Hov 0d F14	-0.933	0.449333	0.561333	2.60367	1.67
He Hov 0d F15	-0.658	0.864333	1.21633	-0.541333	1.705
He Hov 3d F1	0.882	0.434333	-1.33867	-3.65133	-1.335
He Hov 3d F2	0.617	0.134333	-0.883667	3.52867	0.225
He Hov 3d F3	1.367	0.359333	-0.218667	0.453667	-1.585
He Hov 3d F4	0.282	0.354333	-0.788667	2.36367	-0.54
He Hov 3d F5	1.567	1.36933	0.446333	2.19367	1.595
He Hov 3d F6	1.032	1.11933	0.366333	1.02367	0.335
He Hov 3d F7	0.437	0.984333	-0.173667	2.45367	0.355
He Hov 3d F8	-0.728	-0.990667	-0.678667	0.383667	-0.675
He Hov 3d F9	-1.388	-2.65067	-2.77367	2.91867	1.305
He Hov 3d F10	0.682	1.01933	0.141333	-1.84633	0.025
He Hov 3d F11	0.597	0.624333	-0.0786667	-0.371333	-2.01
He Hov 3d F12	-0.618	-0.750667	-1.51867	-0.141333	0.41
He Hov 3d F13	0.297	0.879333	0.241333	0.523667	2.465
He Hov 3d F14	0.562	1.20433	0.406333	-0.826333	-0.905
He Hov 3d F15	0.022	1.01433	1.61633	1.26867	-0.365
He Hov 7d F1	2.452	1.82933	0.536333	1.47867	-0.01
He Hov 7d F2	1.452	0.464333	0.171333	0.188667	-1.25
He Hov 7d F3	2.042	1.33933	0.576333	2.03367	-0.955
He Hov 7d F4	-0.948	-1.49567	-1.49867	1.39867	-0.88
He Hov 7d F5	0.862	-0.220667	-1.49367	-0.736333	0.665
He Hov 7d F6	1.637	1.24433	0.481333	2.16367	-0.53
He Hov 7d F7	0.757	0.614333	-0.193667	1.98367	-1.255
He Hov 7d F8	0.877	0.669333	-0.208667	-4.48133	-0.995
He Hov 7d F9	0.817	0.644333	1.25133	-0.146333	1.13
He Hov 7d F10	0.747	0.994333	1.01633	4.56367	-0.08
He Hov 7d F11	1.277	0.749333	-0.0636667	-0.0513333	-0.75
He Hov 7d F12	1.282	0.804333	0.651333	-0.171333	1.035
He Hov 7d F13	0.467	0.489333	1.03633	4.48367	0.675
He Hov 7d F14	1.232	0.729333	0.941333	3.06367	0.18
He Hov 7d F15	1.417	1.32433	1.04633	0.203667	0.385
He Hov 14d F1	-0.943	0.189333	1.30133	0.478667	-0.16
He Hov 14d F2	-0.213	-0.540667	-0.0136667	-0.646333	-0.675
He Hov 14D F3	-0.953	-0.415667	-0.538667	0.578667	0.08
He Hov 14d F4	0.147	-0.165667	0.146333	0.758667	2.66
He Hov 14d F5	-1.048	-1.39067	-0.453667	0.618667	-0.545
He Hov 14d F6	-0.908	-0.910667	-0.738667	-1.35133	0.42
He Hov 14d F7	-1.778	-1.50567	-1.18867	6.02867	-1.075
He Hov 14d F8	0.197	0.649333	-0.208667	-1.66133	0.575
He Hov 14d F9	-1.083	-0.115667	-0.383667	0.0336667	-0.62
He Hov 14d F10	1.137	1.45933	1.06133	0.898667	-0.115
He Hov 14d F11	-1.813	-2.21067	-1.76367	0.388667	-0.905
He Hov 14d F12	-0.903	-0.185667	-0.0136667	-2.27633	-0.715
He Hov 14d F13	-1.098	-1.11567	-0.308667	4.24867	1.5
He Hov 14d F14	0.382	0.419333	-1.13367	1.31367	0.68
He Hov 14d F15	-1.613	-0.720667	-1.06367	3.22367	0.07
He Stress 0d F1	-1.643	-1.15067	-1.34367	3.53367	-1.41
He Stress 0d F2	-1.473	-0.840667	-0.268667	2.69867	-1.31
He Stress 0d F3	-1.688	-2.31067	-2.01867	-0.781333	-0.315
He Stress 0d F4	-1.703	-1.42567	-1.39867	-2.41133	0.375
He Stress 0d F5	-0.618	0.634333	-0.468667	2.15867	0.295
He Stress 0d F6	-0.428	-0.315667	-1.97867	-0.356333	0.28
He Stress 0d F7	-1.708	-1.30567	-0.693667	3.16867	-0.205
He Stress 0d F8	-0.938	-0.270667	-1.85367	5.17367	1.065
He Stress 0d F9	-1.808	-2.44567	-2.71367	-4.86133	0.58
He Stress 0d F10	-2.958	-2.75567	0.461333	0.583667	2.135
He Stress 0d F11	-2.028	-1.92067	0.141333	5.53367	1.96
He Stress 0d F12	-2.628	-2.28067	0.406333	3.58867	-0.1
He Stress 0d F13	-1.863	-1.05067	0.156333	1.69867	1.005
He Stress 0d F14	-2.263	-1.38567	-0.613667	3.01867	-0.84
He Stress 0d F15	-1.708	-1.41567	-1.03867	5.88867	-0.685
He Stress 14d F1	-1.808	-1.32067	-0.913667	2.25367	0.545
He Stress 14d F2	-2.108	-1.90067	-1.05367	2.84867	-0.395
He Stress 14d F3	-1.693	-1.02067	-0.508667	0.653667	-0.405
He Stress 14d F4	-2.118	-1.07067	-0.573667	0.0986667	-1.28
He Stress 14d F5	-2.663	-2.03567	-0.00366667	1.11867	-0.22
He Stress 14d F6	-1.763	-2.84567	-2.24867	1.16867	0.72
He Stress 14d F7	-2.223	-2.78567	-1.19367	-2.59633	-1.17
He Stress 14d F8	-2.113	-1.37567	-0.763667	2.73367	1.17
He Stress 14d F9	-1.328	-0.480667	0.241333	3.07367	-1.815
He Srtess 14d F10	-1.958	-1.63067	-0.473667	-0.351333	-0.38
He Stress 14d F11	-1.828	-1.10067	0.401333	1.03367	0.375
He Stress 14d F12	-2.768	-2.33567	0.0513333	2.38867	-0.67
He Stress 14d F13	-2.318	-2.37567	-0.973667	0.868667
He Stress 14d F14	-2.333	-1.96067		2.35367	0.545
He Stress 14d F15	-2.243	-1.37067	-1.15367	3.23867	-1.11
Pfaffel values
sample	IERG2	JUNB	TNF1a	iNOS	Ryr1
He Hov 0d F1	0.464258	0.489936	0.803108	27.4995	1.03526
He Hov 0d F2	0.434672	0.5493	0.303268	4.0176	1.65864
He Hov 0d F3	1.78757	3.64436	3.61418	1.25818	0.429283
He Hov 0d F4	1.62789	3.96046	1.5896	2.3075	0.737135
He Hov 0d F5	0.321524	0.466732	0.230632	0.588997	1.07923
He Hov 0d F6	0.65884	0.637575	0.596117	1.10292	2.09217
He Hov 0d F7	3.38229	5.94084	3.07091	0.103761	2.08493
He Hov 0d F8	1.15509	0.959707	1.05239	12.3064	1.48968
He Hov 0d F9	1.58887	3.85216	1.34133	1.37681	1.50004
He Hov 0d F10	0.890693	0.86794	3.09227	1.76704	0.812252
He Hov 0d F11	0.948027	0.607378	1.46781	0.51991	1.38511
He Hov 0d F12	0.991717	0.444627	0.881888	0.457338	1.48968
He Hov 0d F13	0.513345	0.417737	1.02716	0.0271357	1.08298
He Hov 0d F14	1.90924	0.732381	0.677676	0.16452	0.314253
He Hov 0d F15	1.57789	0.5493	0.430375	1.45532	0.306721
He Hov 3d F1	0.542615	0.740036	2.52917	12.565	2.52275
He Hov 3d F2	0.652025	0.911091	1.84506	0.0866494	0.855595
He Hov 3d F3	0.387697	0.779525	1.16366	0.730185	3.00008
He Hov 3d F4	0.82245	0.782231	1.72748	0.194297	1.45397
He Hov 3d F5	0.337509	0.38707	0.733906	0.218595	0.331022
He Hov 3d F6	0.489032	0.460306	0.775752	0.491865	0.792784
He Hov 3d F7	0.738669	0.505459	1.12792	0.182546	0.78187
He Hov 3d F8	1.65634	1.9871	1.60066	0.766487	1.5966
He Hov 3d F9	2.61716	6.27957	6.83844	0.132249	0.404721
He Hov 3d F10	0.623301	0.493344	0.906681	3.59585	0.982821
He Hov 3d F11	0.661127	0.648719	1.05604	1.29355	4.02782
He Hov 3d F12	1.53475	1.68257	2.86526	1.10292	0.752623
He Hov 3d F13	0.813943	0.543619	0.845963	0.695602	0.181118
He Hov 3d F14	0.677362	0.43397	0.754539	1.77317	1.87254
He Hov 3d F15	0.984866	0.495057	0.326163	0.415043	1.28788
He Hov 7d F1	0.182757	0.281395	0.689521	0.35882	1.00696
He Hov 7d F2	0.365514	0.724806	0.888022	0.877416	2.37841
He Hov 7d F3	0.242827	0.395203	0.670666	0.244234	1.93858
He Hov 7d F4	1.9292	2.81994	2.82581	0.37928	1.84038
He Hov 7d F5	0.550189	1.16527	2.81604	1.66594	0.630689
He Hov 7d F6	0.321524	0.422103	0.716315	0.223188	1.44393
He Hov 7d F7	0.591726	0.653232	1.14367	0.252846	2.38667
He Hov 7d F8	0.544499	0.628797	1.15562	22.3365	1.99308
He Hov 7d F9	0.567621	0.639788	0.42006	1.10675	0.456916
He Hov 7d F10	0.595841	0.501968	0.494371	0.0422863	1.05702
He Hov 7d F11	0.412653	0.594878	1.04512	1.03622	1.68179
He Hov 7d F12	0.411225	0.572627	0.636692	1.1261	0.488016
He Hov 7d F13	0.723467	0.712354	0.487565	0.0446974	0.626332
He Hov 7d F14	0.425727	0.603183	0.520751	0.119604	0.882703
He Hov 7d F15	0.37449	0.399334	0.484197	0.868341	0.765779
He Hov 14d F1	1.92252	0.877011	0.405751	0.717641	1.11729
He Hov 14d F2	1.1591	1.45464	1.00952	1.56519	1.5966
He Hov 14D F3	1.93589	1.33391	1.45263	0.669582	0.946058
He Hov 14d F4	0.903127	1.12168	0.903544	0.591042	0.15822
He Hov 14d F5	2.06766	2.622	1.36952	0.651273	1.45902
He Hov 14d F6	1.87644	1.87991	1.66863	2.55148	0.747425
He Hov 14d F7	3.4295	2.83956	2.27942	0.0153176	2.10672
He Hov 14d F8	0.872363	0.637575	1.15562	3.16309	0.671286
He Hov 14d F9	2.11844	1.08348	1.30465	0.976934	1.53688
He Hov 14d F10	0.454704	0.363661	0.479189	0.536382	1.08298
He Hov 14d F11	3.51372	4.62889	3.3956	0.763835	1.87254
He Hov 14d F12	1.86995	1.13734	1.00952	4.84445	1.64148
He Hov 14d F13	2.14058	2.16695	1.23856	0.0526046	0.353553
He Hov 14d F14	0.767373	0.74777	2.19416	0.402297	0.624165
He Hov 14d F15	3.05887	1.64794	2.09024	0.107048	0.952638
He Stress 0d F1	3.12315	2.22016	2.53796	0.0863496	2.65737
He Stress 0d F2	2.77599	1.79088	1.20469	0.154035	2.47942
He Stress 0d F3	3.2221	4.96112	4.05209	1.71872	1.24401
He Stress 0d F4	3.25577	2.68639	2.63658	5.31966	0.771105
He Stress 0d F5	1.53475	0.644238	1.38383	0.223963	0.815072
He Stress 0d F6	1.34537	1.24459	3.94129	1.28017	0.823591
He Stress 0d F7	3.26708	2.47198	1.61739	0.111208	1.15269
He Stress 0d F8	1.91587	1.20637	3.61418	0.0277058	0.477973
He Stress 0d F9	3.50157	5.44777	6.55987	29.0675	0.668964
He Stress 0d F10	7.77046	6.75365	0.726315	0.667266	0.227667
He Stress 0d F11	4.07839	3.78598	0.906681	0.0215874	0.257028
He Stress 0d F12	6.18168	4.85902	0.754539	0.0831196	1.07177
He Stress 0d F13	3.63763	2.07149	0.897303	0.308071	0.49827
He Stress 0d F14	4.79989	2.61293	1.53014	0.123393	1.79005
He Stress 0d F15	3.26708	2.66783	2.05433	0.0168785	1.6077
He Stress 14d F1	3.50157	2.49782	1.88383	0.20969	0.685391
He Stress 14d F2	4.31093	3.73386	2.0758	0.138824	1.31494
He Stress 14d F3	3.23328	2.02886	1.42273	0.635663	1.32409
He Stress 14d F4	4.34092	2.1004	1.4883	0.933896	2.42839
He Stress 14d F5	6.33349	4.10012	1.00254	0.460519	1.16473
He Stress 14d F6	3.39403	7.18838	4.75243	0.444832	0.607097
He Stress 14d F7	4.66863	6.89555	2.28733	6.04748	2.25012
He Stress 14d F8	4.3259	2.59488	1.6978	0.150343	0.444421
He Stress 14d F9	2.51054	1.39539	0.845963	0.118777	3.5186
He Srtess 14d F10	3.88523	3.09656	1.38863	1.27574	1.30134
He Stress 14d F11	3.55045	2.14454	0.757158	0.488467	0.771105
He Stress 14d F12	6.81163	5.04784	0.965044	0.190959	1.59107
He Stress 14d F13	4.9864	5.18976	1.96383	0.547653
He Stress 14d F14	5.03852	3.89242		0.195648	0.685391
He Stress 14d F15	4.7338	2.5859	2.22479	0.105941	2.15846
log2 Pfaffel values
sample	IERG2	JUNB	TNF1a	iNOS	Ryr1
He Hov 0d F1	-1.107	-1.02933	-0.316333	4.78133	0.05
He Hov 0d F2	-1.202	-0.864333	-1.72133	2.00633	0.73
He Hov 0d F3	0.838	1.86567	1.85367	0.331333	-1.22
He Hov 0d F4	0.703	1.98567	0.668667	1.20633	-0.44
He Hov 0d F5	-1.637	-1.09933	-2.11633	-0.763667	0.11
He Hov 0d F6	-0.602	-0.649333	-0.746333	0.141333	1.065
He Hov 0d F7	1.758	2.57067	1.61867	-3.26867	1.06
He Hov 0d F8	0.208	-0.0593333	0.0736667	3.62133	0.575
He Hov 0d F9	0.668	1.94567	0.423667	0.461333	0.585
He Hov 0d F10	-0.167	-0.204333	1.62867	0.821333	-0.3
He Hov 0d F11	-0.077	-0.719333	0.553667	-0.943667	0.47
He Hov 0d F12	-0.012	-1.16933	-0.181333	-1.12867	0.575
He Hov 0d F13	-0.962	-1.25933	0.0386667	-5.20367	0.115
He Hov 0d F14	0.933	-0.449333	-0.561333	-2.60367	-1.67
He Hov 0d F15	0.658	-0.864333	-1.21633	0.541333	-1.705
He Hov 3d F1	-0.882	-0.434333	1.33867	3.65133	1.335
He Hov 3d F2	-0.617	-0.134333	0.883667	-3.52867	-0.225
He Hov 3d F3	-1.367	-0.359333	0.218667	-0.453667	1.585
He Hov 3d F4	-0.282	-0.354333	0.788667	-2.36367	0.54
He Hov 3d F5	-1.567	-1.36933	-0.446333	-2.19367	-1.595
He Hov 3d F6	-1.032	-1.11933	-0.366333	-1.02367	-0.335
He Hov 3d F7	-0.437	-0.984333	0.173667	-2.45367	-0.355
He Hov 3d F8	0.728	0.990667	0.678667	-0.383667	0.675
He Hov 3d F9	1.388	2.65067	2.77367	-2.91867	-1.305
He Hov 3d F10	-0.682	-1.01933	-0.141333	1.84633	-0.025
He Hov 3d F11	-0.597	-0.624333	0.0786667	0.371333	2.01
He Hov 3d F12	0.618	0.750667	1.51867	0.141333	-0.41
He Hov 3d F13	-0.297	-0.879333	-0.241333	-0.523667	-2.465
He Hov 3d F14	-0.562	-1.20433	-0.406333	0.826333	0.905
He Hov 3d F15	-0.022	-1.01433	-1.61633	-1.26867	0.365
He Hov 7d F1	-2.452	-1.82933	-0.536333	-1.47867	0.01
He Hov 7d F2	-1.452	-0.464333	-0.171333	-0.188667	1.25
He Hov 7d F3	-2.042	-1.33933	-0.576333	-2.03367	0.955
He Hov 7d F4	0.948	1.49567	1.49867	-1.39867	0.88
He Hov 7d F5	-0.862	0.220667	1.49367	0.736333	-0.665
He Hov 7d F6	-1.637	-1.24433	-0.481333	-2.16367	0.53
He Hov 7d F7	-0.757	-0.614333	0.193667	-1.98367	1.255
He Hov 7d F8	-0.877	-0.669333	0.208667	4.48133	0.995
He Hov 7d F9	-0.817	-0.644333	-1.25133	0.146333	-1.13
He Hov 7d F10	-0.747	-0.994333	-1.01633	-4.56367	0.08
He Hov 7d F11	-1.277	-0.749333	0.0636667	0.0513333	0.75
He Hov 7d F12	-1.282	-0.804333	-0.651333	0.171333	-1.035
He Hov 7d F13	-0.467	-0.489333	-1.03633	-4.48367	-0.675
He Hov 7d F14	-1.232	-0.729333	-0.941333	-3.06367	-0.18
He Hov 7d F15	-1.417	-1.32433	-1.04633	-0.203667	-0.385
He Hov 14d F1	0.943	-0.189333	-1.30133	-0.478667	0.16
He Hov 14d F2	0.213	0.540667	0.0136667	0.646333	0.675
He Hov 14D F3	0.953	0.415667	0.538667	-0.578667	-0.08
He Hov 14d F4	-0.147	0.165667	-0.146333	-0.758667	-2.66
He Hov 14d F5	1.048	1.39067	0.453667	-0.618667	0.545
He Hov 14d F6	0.908	0.910667	0.738667	1.35133	-0.42
He Hov 14d F7	1.778	1.50567	1.18867	-6.02867	1.075
He Hov 14d F8	-0.197	-0.649333	0.208667	1.66133	-0.575
He Hov 14d F9	1.083	0.115667	0.383667	-0.0336667	0.62
He Hov 14d F10	-1.137	-1.45933	-1.06133	-0.898667	0.115
He Hov 14d F11	1.813	2.21067	1.76367	-0.388667	0.905
He Hov 14d F12	0.903	0.185667	0.0136667	2.27633	0.715
He Hov 14d F13	1.098	1.11567	0.308667	-4.24867	-1.5
He Hov 14d F14	-0.382	-0.419333	1.13367	-1.31367	-0.68
He Hov 14d F15	1.613	0.720667	1.06367	-3.22367	-0.07
He Stress 0d F1	1.643	1.15067	1.34367	-3.53367	1.41
He Stress 0d F2	1.473	0.840667	0.268667	-2.69867	1.31
He Stress 0d F3	1.688	2.31067	2.01867	0.781333	0.315
He Stress 0d F4	1.703	1.42567	1.39867	2.41133	-0.375
He Stress 0d F5	0.618	-0.634333	0.468667	-2.15867	-0.295
He Stress 0d F6	0.428	0.315667	1.97867	0.356333	-0.28
He Stress 0d F7	1.708	1.30567	0.693667	-3.16867	0.205
He Stress 0d F8	0.938	0.270667	1.85367	-5.17367	-1.065
He Stress 0d F9	1.808	2.44567	2.71367	4.86133	-0.58
He Stress 0d F10	2.958	2.75567	-0.461333	-0.583667	-2.135
He Stress 0d F11	2.028	1.92067	-0.141333	-5.53367	-1.96
He Stress 0d F12	2.628	2.28067	-0.406333	-3.58867	0.1
He Stress 0d F13	1.863	1.05067	-0.156333	-1.69867	-1.005
He Stress 0d F14	2.263	1.38567	0.613667	-3.01867	0.84
He Stress 0d F15	1.708	1.41567	1.03867	-5.88867	0.685
He Stress 14d F1	1.808	1.32067	0.913667	-2.25367	-0.545
He Stress 14d F2	2.108	1.90067	1.05367	-2.84867	0.395
He Stress 14d F3	1.693	1.02067	0.508667	-0.653667	0.405
He Stress 14d F4	2.118	1.07067	0.573667	-0.0986667	1.28
He Stress 14d F5	2.663	2.03567	0.00366667	-1.11867	0.22
He Stress 14d F6	1.763	2.84567	2.24867	-1.16867	-0.72
He Stress 14d F7	2.223	2.78567	1.19367	2.59633	1.17
He Stress 14d F8	2.113	1.37567	0.763667	-2.73367	-1.17
He Stress 14d F9	1.328	0.480667	-0.241333	-3.07367	1.815
He Srtess 14d F10	1.958	1.63067	0.473667	0.351333	0.38
He Stress 14d F11	1.828	1.10067	-0.401333	-1.03367	-0.375
He Stress 14d F12	2.768	2.33567	-0.0513333	-2.38867	0.67
He Stress 14d F13	2.318	2.37567	0.973667	-0.868667
He Stress 14d F14	2.333	1.96067		-2.35367	-0.545
He Stress 14d F15	2.243	1.37067	1.15367	-3.23867	1.11

## Sheet: CT aver_Skin
Name	EF1a	diff	EF1a	Muc5	diff	Muc5	MMP9	diff	MMP9
Sk Hov 0d F1	17.77	17.77	17.77	29.45	0.27	29.315	28.47	0.46	28.24
Sk Hov 0d F1				29.18			28.01
Sk Hov 0d F2	18.06	0.04	18.08	27.78	0.02	27.77	27.85	0.07	27.885
Sk Hov 0d F2	18.1			27.76			27.92
Sk Hov 0d F3	17.9	0.02	17.89	30.71	0.38	30.52	29.64	0.12	29.58
Sk Hov 0d F3	17.88			30.33			29.52
Sk Hov 0d F4	18.72	0.02	18.73	30.6	0.25	30.725	32.02	0.11	32.075
Sk Hov 0d F4	18.74			30.85			32.13
Sk Hov 0d F5	17.01	0.04	16.99	29.55	0.34	29.38	25.17	0.49	25.415
Sk Hov 0d F5	16.97			29.21			25.66
Sk Hov 0d F6	18.31	0.12	18.37	27.85	0.01	27.855	29.88	0.36	30.06
Sk Hov 0d F6	18.43			27.86			30.24
Sk Hov 0d F7	17.65	0.17	17.565	29.59	0.04	29.57	25.46	0.03	25.475
Sk Hov 0d F7	17.48			29.55			25.49
Sk Hov 0d F8	18.64	0.07	18.605	32.13	0.09	32.175	32	0.13	31.935
Sk Hov 0d F8	18.57			32.22			31.87
Sk Hov 0d F9	18.1	0.09	18.145	28.54	0.12	28.6	28.98	0.13	29.045
Sk Hov 0d F9	18.19			28.66			29.11
Sk Hov 0d F10	18.58	0.04	18.56	29.94	0.12	30	28.13	0.39	28.325
Sk Hov 0d F10	18.54			30.06			28.52
Sk Hov 0d F11	18.78	0.01	18.775	30.7	0.41	30.495	30.6	0.1	30.55
Sk Hov 0d F11	18.77			30.29			30.5
Sk Hov 0d F12	18.18	0.02	18.19	28.58	0.09	28.535	30.2	0.38	30.39
Sk Hov 0d F12	18.2			28.49			30.58
Sk Hov 0d F13	18.3	0.1	18.25	30.02	0.06	30.05	28.22	0.1	28.17
Sk Hov 0d F13	18.2			30.08			28.12
Sk Hov 0d F14	17.58	0.08	17.62	28.27	0.21	28.375	27.65	0.06	27.68
Sk Hov 0d F14	17.66			28.48			27.71
Sk Hov 0d F15	18.04	0.11	17.985	29.22	0.08	29.18	26.55	0.03	26.565
Sk Hov 0d F15	17.93			29.14			26.58
Sk Hov 3d F1	17.47	0.01	17.475	28.86	0.03	28.875	26.56	0.25	26.435
Sk Hov 3d F1	17.48			28.89			26.31
Sk Hov 3d F2	17.77	0.03	17.755	28.95	0.01	28.945	26.91	0.05	26.885
Sk Hov 3d F2	17.74			28.94			26.86
Sk Hov 3d F3	17.94	0.17	18.025	27.81	0.06	27.84	29.82	0.06	29.85
Sk Hov 3d F3	18.11			27.87			29.88
Sk Hov 3d F4	17.55	0.05	17.525	28.53	0.05	28.505	26.34	0.01	26.335
Sk Hov 3d F4	17.5			28.48			26.33
Sk Hov 3d F5	18.1	0.02	18.11	29.18	0.03	29.195	27.65	0.02	27.66
Sk Hov 3d F5	18.12			29.21			27.67
Sk Hov 3d F6	18.5	0.05	18.475	28.84	0.1	28.79	29.76	0.01	29.755
Sk Hov 3d F6	18.45			28.74			29.75
Sk Hov 3d F7	18.5	0.17	18.415	30.61	0.31	30.765	29.86	0	29.86
Sk Hov 3d F7	18.33			30.92			29.86
Sk Hov 3d F8	18.52	0.02	18.51	29.69	0.1	29.64	29.6	0.11	29.655
Sk Hov 3d F8	18.5			29.59			29.71
Sk Hov 3d F9	18.5	0.04	18.52	29.25	0.01	29.255	30.13	0.36	30.31
Sk Hov 3d F9	18.54			29.26			30.49
Sk Hov 3d F10	17.58	0.07	17.545	28.68	0.2	28.58	27.03	0.01	27.025
Sk Hov 3d F10	17.51			28.48			27.02
Sk Hov 3d F11	17.88	0.07	17.915	28.71	0.16	28.63	25.82	0.01	25.825
Sk Hov 3d F11	17.95			28.55			25.83
Sk Hov 3d F12	18.27	0.06	18.24	30.14	0.38	30.33	28.78	0.05	28.805
Sk Hov 3d F12	18.21			30.52			28.83
Sk Hov 3d F13	17.79	0.02	17.8	29.94	0.19	29.845	27.69	0.03	27.705
Sk Hov 3d F13	17.81			29.75			27.72
Sk Hov 3d F14	18.24	0.04	18.22	28.77	0.07	28.805	28.89	0.01	28.885
Sk Hov 3d F14	18.2			28.84			28.88
Sk Hov 3d F15	18.57	0.08	18.61	31.97	0.33	31.805	31.51	0.03	31.525
Sk Hov 3d F15	18.65			31.64			31.54
Sk Hov 7d F1	18.62	0.04	18.64	30.12	0.43	30.335	30	0.12	29.94
Sk Hov 7d F1	18.66			30.55			29.88
Sk Hov 7d F2	17.33	0.22	17.22	29.1	0.13	29.165	26.31	0.05	26.285
Sk Hov 7d F2	17.11			29.23			26.26
Sk Hov 7d F3	17.69	0.16	17.77	28.83	0.13	28.765	27.44	0.07	27.475
Sk Hov 7d F3	17.85			28.7			27.51
Sk Hov 7d F4	17.56	0.09	17.605	29.09	0.17	29.175	27.2	0.11	27.145
Sk Hov 7d F4	17.65			29.26			27.09
Sk Hov 7d F5	17.01	0.23	17.125	27.81	0.13	27.875	25.44	0.13	25.375
Sk Hov 7d F5	17.24			27.94			25.31
Sk Hov 7d F6	17.75	0.23	17.865	28.98	0.14	29.05	29.75	0.01	29.745
Sk Hov 7d F6	17.98			29.12			29.74
Sk Hov 7d F7	18.04	0.11	17.985	29.14	0.15	29.065	29.51	0.37	29.325
Sk Hov 7d F7	17.93			28.99			29.14
Sk Hov 7d F8	18.15	0.06	18.18	30.25	0.08	30.29	29.29	0.16	29.37
Sk Hov 7d F8	18.21			30.33			29.45
Sk Hov 7d F9	18.05	0.13	17.985	29.9	0.06	29.87	29.98	0.06	30.01
Sk Hov 7d F9	17.92			29.84			30.04
Sk Hov 7d F10	18.34	0.11	18.285	30.89	0.74	30.52	28.02	0.05	27.995
Sk Hov 7d F10	18.23			30.15			27.97
Sk Hov 7d F11	17.9	0.16	17.82	29.47	0.28	29.61	27.79	0.05	27.765
Sk Hov 7d F11	17.74			29.75			27.74
Sk Hov 7d F12	17.76	0.08	17.8	29.64	0.13	29.705	28.56	0.05	28.585
Sk Hov 7d F12	17.84			29.77			28.61
Sk Hov 7d F13	18.52	0.03	18.505	29.52	0.08	29.48	30.61	0.17	30.525
Sk Hov 7d F13	18.49			29.44			30.44
Sk Hov 7d F14	17.69	0.04	17.71	29	0.1	28.95	27.93	0.2	28.03
Sk Hov 7d F14	17.73			28.9			28.13
Sk Hov 7d F15	17.75	0.14	17.82	30.05	0.14	30.12	28.49	0.03	28.505
Sk Hov 7d F15	17.89			30.19			28.52
Sk Hov 14d F1	17.96	0.06	17.93	28.6	0.09	28.555	27.61	0.06	27.58
Sk Hov 14d F1	17.9			28.51			27.55
Sk Hov 14d F2	17.94	0.01	17.945	29.6	0.16	29.52	29.83	0.08	29.79
Sk Hov 14d F2	17.95			29.44			29.75
Sk Hov 14d F3	18.34	0.02	18.33	29.5	0.16	29.58	29.89	0.08	29.93
Sk Hov 14d F3	18.32			29.66			29.97
Sk Hov 14d F4	18.61	0.02	18.6	30.88	0.25	31.005	30.89	0.14	30.82
Sk Hov 14d F4	18.59			31.13			30.75
Sk Hov 14d F5	21.34	0.16	21.26	31.54	0.24	31.42	33.02	0.47	33.255
Sk Hov 14d F5	21.18			31.3			33.49
Sk Hov 14d F6	18.27	0.29	18.125	29.76	0.06	29.79	30	0.09	30.045
Sk Hov 14d F6	17.98			29.82			30.09
Sk Hov 14d F7	17.91	0.12	17.97	30.23	0.52	29.97	28.92	0.16	28.84
Sk Hov 14d F7	18.03			29.71			28.76
Sk Hov 14d F8	18.24	0.03	18.225	30.45	0.84	30.87	30.82	0	30.82
Sk Hov 14d F8	18.21			31.29			30.82
Sk Hov 14d F9	17.57	0.13	17.635	30.55	0.42	30.34	28.65	0.09	28.695
Sk Hov 14d F9	17.7			30.13			28.74
Sk Hov 14d F10	17.8	0.01	17.795	29.51	0.28	29.37	26.91	0	26.91
Sk Hov 14d F10	17.79			29.23			26.91
Sk Hov 14d F11	17.1	0.03	17.115	30.21	0.33	30.045	26.53	0.01	26.535
Sk Hov 14d F11	17.13			29.88			26.54
Sk Hov 14d F12	19	0.08	19.04	31.33	0.03	31.315	31.81	0.11	31.865
Sk Hov 14d F12	19.08			31.3			31.92
Sk Hov 14d F13	17.96	0.02	17.97	29.49	0.15	29.415	29.77	0	29.77
Sk Hov 14d F13	17.98			29.34			29.77
Sk Hov 14d F14	17.93	0.07	17.895	29.98	0.26	30.11	27.79	0.16	27.87
Sk Hov 14d F14	17.86			30.24			27.95
Sk Hov 14d F15	17.83	0.02	17.84	29.91	0.23	29.795	29.84	0.11	29.895
Sk Hov 14d F15	17.85			29.68			29.95

## Sheet: Calc_Skin
Enter sample names, norm gene values and efficienty!																					Enter control names, norm gene values and efficienty!
Gene name	sample	CT Norm	Efficiency																		sample	CT Norm
EF1a+18S av	Sk Hov 0d F1	17.77	1			fill in sample values and gene names															Sk Hov 0d F1	17.77
	Sk Hov 0d F2	18.08				fill in control values															Sk Hov 0d F2	18.08
	Sk Hov 0d F3	17.89																			Sk Hov 0d F3	17.89
	Sk Hov 0d F4	18.73																			Sk Hov 0d F4	18.73
	Sk Hov 0d F5	16.99																			Sk Hov 0d F5	16.99
	Sk Hov 0d F6	18.37																			Sk Hov 0d F6	18.37
	Sk Hov 0d F7	17.565																			Sk Hov 0d F7	17.565
	Sk Hov 0d F8	18.605																			Sk Hov 0d F8	18.605
	Sk Hov 0d F9	18.145																			Sk Hov 0d F9	18.145
	Sk Hov 0d F10	18.56																			Sk Hov 0d F10	18.56
	Sk Hov 0d F11	18.775																			Sk Hov 0d F11	18.775
	Sk Hov 0d F12	18.19																			Sk Hov 0d F12	18.19
	Sk Hov 0d F13	18.25																			Sk Hov 0d F13	18.25
	Sk Hov 0d F14	17.62																			Sk Hov 0d F14	17.62
	Sk Hov 0d F15	17.985																			Sk Hov 0d F15	17.985
	Sk Hov 3d F1	17.475
	Sk Hov 3d F2	17.755
	Sk Hov 3d F3	18.025
	Sk Hov 3d F4	17.525
	Sk Hov 3d F5	18.11
	Sk Hov 3d F6	18.475
	Sk Hov 3d F7	18.415
	Sk Hov 3d F8	18.51
	Sk Hov 3d F9	18.52
	Sk Hov 3d F10	17.545
	Sk Hov 3d F11	17.915
	Sk Hov 3d F12	18.24
	Sk Hov 3d F13	17.8
	Sk Hov 3d F14	18.22
	Sk Hov 3d F15	18.61
	Sk Hov 7d F1	18.64
	Sk Hov 7d F2	17.22
	Sk Hov 7d F3	17.77
	Sk Hov 7d F4	17.605
	Sk Hov 7d F5	17.125
	Sk Hov 7d F6	17.865
	Sk Hov 7d F7	17.985
	Sk Hov 7d F8	18.18
	Sk Hov 7d F9	17.985
	Sk Hov 7d F10	18.285
	Sk Hov 7d F11	17.82
	Sk Hov 7d F12	17.8
	Sk Hov 7d F13	18.505
	Sk Hov 7d F14	17.71
	Sk Hov 7d F15	17.82
	Sk Hov 14d F1	17.93
	Sk Hov 14d F2	17.945
	Sk Hov 14d F3	18.33
	Sk Hov 14d F4	18.6
	Sk Hov 14d F5	21.26
	Sk Hov 14d F6	18.125
	Sk Hov 14d F7	17.97
	Sk Hov 14d F8	18.225
	Sk Hov 14d F9	17.635
	Sk Hov 14d F10	17.795
	Sk Hov 14d F11	17.115
	Sk Hov 14d F12	19.04
	Sk Hov 14d F13	17.97
	Sk Hov 14d F14	17.895
	Sk Hov 14d F15	17.84
																					Norm Average	18.1017
Enter genes and efficienties!
genes:	MUC5	MMP9
E %	1	1	1	1	1
Enter values!	CT-values:																				Enter values!	CT-values:
sample	MUC5	MMP9																			sample	MUC5	MMP9
Sk Hov 0d F1	29.315	28.24																			Sk Hov 0d F1	29.315	28.24
Sk Hov 0d F2	27.77	27.885																			Sk Hov 0d F2	27.77	27.885
Sk Hov 0d F3	30.52	29.58																			Sk Hov 0d F3	30.52	29.58
Sk Hov 0d F4	30.725	32.075																			Sk Hov 0d F4	30.725	32.075
Sk Hov 0d F5	29.38	25.415																			Sk Hov 0d F5	29.38	25.415
Sk Hov 0d F6	27.855	30.06																			Sk Hov 0d F6	27.855	30.06
Sk Hov 0d F7	29.57	25.475																			Sk Hov 0d F7	29.57	25.475
Sk Hov 0d F8	32.175	31.935																			Sk Hov 0d F8	32.175	31.935
Sk Hov 0d F9	28.6	29.045																			Sk Hov 0d F9	28.6	29.045
Sk Hov 0d F10	30	28.325																			Sk Hov 0d F10	30	28.325
Sk Hov 0d F11	30.495	30.55																			Sk Hov 0d F11	30.495	30.55
Sk Hov 0d F12	28.535	30.39																			Sk Hov 0d F12	28.535	30.39
Sk Hov 0d F13	30.05	28.17																			Sk Hov 0d F13	30.05	28.17
Sk Hov 0d F14	28.375	27.68																			Sk Hov 0d F14	28.375	27.68
Sk Hov 0d F15	29.18	26.565																			Sk Hov 0d F15	29.18	26.565
Sk Hov 3d F1	28.875	26.435
Sk Hov 3d F2	28.945	26.885
Sk Hov 3d F3	27.84	29.85
Sk Hov 3d F4	28.505	26.335
Sk Hov 3d F5	29.195	27.66
Sk Hov 3d F6	28.79	29.755
Sk Hov 3d F7	30.765	29.86
Sk Hov 3d F8	29.64	29.655
Sk Hov 3d F9	29.255	30.31
Sk Hov 3d F10	28.58	27.025
Sk Hov 3d F11	28.63	25.825
Sk Hov 3d F12	30.33	28.805
Sk Hov 3d F13	29.845	27.705
Sk Hov 3d F14	28.805	28.885
Sk Hov 3d F15	31.805	31.525
Sk Hov 7d F1	30.335	29.94
Sk Hov 7d F2	29.165	26.285
Sk Hov 7d F3	28.765	27.475
Sk Hov 7d F4	29.175	27.145
Sk Hov 7d F5	27.875	25.375
Sk Hov 7d F6	29.05	29.745
Sk Hov 7d F7	29.065	29.325
Sk Hov 7d F8	30.29	29.37
Sk Hov 7d F9	29.87	30.01
Sk Hov 7d F10	30.52	27.995
Sk Hov 7d F11	29.61	27.765
Sk Hov 7d F12	29.705	28.585
Sk Hov 7d F13	29.48	30.525
Sk Hov 7d F14	28.95	28.03
Sk Hov 7d F15	30.12	28.505
Sk Hov 14d F1	28.555	27.58
Sk Hov 14d F2	29.52	29.79
Sk Hov 14d F3	29.58	29.93
Sk Hov 14d F4	31.005	30.82
Sk Hov 14d F5	31.42	33.255
Sk Hov 14d F6	29.79	30.045
Sk Hov 14d F7	29.97	28.84
Sk Hov 14d F8	30.87	30.82
Sk Hov 14d F9	30.34	28.695
Sk Hov 14d F10	29.37	26.91
Sk Hov 14d F11	30.045	26.535
Sk Hov 14d F12	31.315	31.865
Sk Hov 14d F13	29.415	29.77
Sk Hov 14d F14	30.11	27.87
Sk Hov 14d F15	29.795	29.895
																					Average control	29.503	28.7593
normalized samples	CT-values:																				normalized control	CT-values:
sample	MUC5	MMP9																			sample	MUC5	MMP9
Sk Hov 0d F1	11.545	10.47																			Sk Hov 0d F1	11.545	10.47
Sk Hov 0d F2	9.69	9.805																			Sk Hov 0d F2	9.69	9.805
Sk Hov 0d F3	12.63	11.69																			Sk Hov 0d F3	12.63	11.69
Sk Hov 0d F4	11.995	13.345																			Sk Hov 0d F4	11.995	13.345
Sk Hov 0d F5	12.39	8.425																			Sk Hov 0d F5	12.39	8.425
Sk Hov 0d F6	9.485	11.69																			Sk Hov 0d F6	9.485	11.69
Sk Hov 0d F7	12.005	7.91																			Sk Hov 0d F7	12.005	7.91
Sk Hov 0d F8	13.57	13.33																			Sk Hov 0d F8	13.57	13.33
Sk Hov 0d F9	10.455	10.9																			Sk Hov 0d F9	10.455	10.9
Sk Hov 0d F10	11.44	9.765																			Sk Hov 0d F10	11.44	9.765
Sk Hov 0d F11	11.72	11.775																			Sk Hov 0d F11	11.72	11.775
Sk Hov 0d F12	10.345	12.2																			Sk Hov 0d F12	10.345	12.2
Sk Hov 0d F13	11.8	9.92																			Sk Hov 0d F13	11.8	9.92
Sk Hov 0d F14	10.755	10.06																			Sk Hov 0d F14	10.755	10.06
Sk Hov 0d F15	11.195	8.58																			Sk Hov 0d F15	11.195	8.58
Sk Hov 3d F1	11.4	8.96
Sk Hov 3d F2	11.19	9.13
Sk Hov 3d F3	9.815	11.825
Sk Hov 3d F4	10.98	8.81
Sk Hov 3d F5	11.085	9.55
Sk Hov 3d F6	10.315	11.28
Sk Hov 3d F7	12.35	11.445
Sk Hov 3d F8	11.13	11.145
Sk Hov 3d F9	10.735	11.79
Sk Hov 3d F10	11.035	9.48
Sk Hov 3d F11	10.715	7.91
Sk Hov 3d F12	12.09	10.565
Sk Hov 3d F13	12.045	9.905
Sk Hov 3d F14	10.585	10.665
Sk Hov 3d F15	13.195	12.915
Sk Hov 7d F1	11.695	11.3
Sk Hov 7d F2	11.945	9.065
Sk Hov 7d F3	10.995	9.705
Sk Hov 7d F4	11.57	9.54
Sk Hov 7d F5	10.75	8.25
Sk Hov 7d F6	11.185	11.88
Sk Hov 7d F7	11.08	11.34
Sk Hov 7d F8	12.11	11.19
Sk Hov 7d F9	11.885	12.025
Sk Hov 7d F10	12.235	9.71
Sk Hov 7d F11	11.79	9.945
Sk Hov 7d F12	11.905	10.785
Sk Hov 7d F13	10.975	12.02
Sk Hov 7d F14	11.24	10.32
Sk Hov 7d F15	12.3	10.685
Sk Hov 14d F1	10.625	9.65
Sk Hov 14d F2	11.575	11.845
Sk Hov 14d F3	11.25	11.6
Sk Hov 14d F4	12.405	12.22
Sk Hov 14d F5	10.16	11.995
Sk Hov 14d F6	11.665	11.92
Sk Hov 14d F7	12	10.87
Sk Hov 14d F8	12.645	12.595
Sk Hov 14d F9	12.705	11.06
Sk Hov 14d F10	11.575	9.115
Sk Hov 14d F11	12.93	9.42
Sk Hov 14d F12	12.275	12.825
Sk Hov 14d F13	11.445	11.8
Sk Hov 14d F14	12.215	9.975
Sk Hov 14d F15	11.955	12.055
ΔΔCt values																					Average control	11.4013	10.6577
sample	MUC5	MMP9
Sk Hov 0d F1	0.143667	-0.187667
Sk Hov 0d F2	-1.71133	-0.852667
Sk Hov 0d F3	1.22867	1.03233
Sk Hov 0d F4	0.593667	2.68733
Sk Hov 0d F5	0.988667	-2.23267
Sk Hov 0d F6	-1.91633	1.03233
Sk Hov 0d F7	0.603667	-2.74767
Sk Hov 0d F8	2.16867	2.67233
Sk Hov 0d F9	-0.946333	0.242333
Sk Hov 0d F10	0.0386667	-0.892667
Sk Hov 0d F11	0.318667	1.11733
Sk Hov 0d F12	-1.05633	1.54233
Sk Hov 0d F13	0.398667	-0.737667
Sk Hov 0d F14	-0.646333	-0.597667
Sk Hov 0d F15	-0.206333	-2.07767
Sk Hov 3d F1	-0.00133333	-1.69767
Sk Hov 3d F2	-0.211333	-1.52767
Sk Hov 3d F3	-1.58633	1.16733
Sk Hov 3d F4	-0.421333	-1.84767
Sk Hov 3d F5	-0.316333	-1.10767
Sk Hov 3d F6	-1.08633	0.622333
Sk Hov 3d F7	0.948667	0.787333
Sk Hov 3d F8	-0.271333	0.487333
Sk Hov 3d F9	-0.666333	1.13233
Sk Hov 3d F10	-0.366333	-1.17767
Sk Hov 3d F11	-0.686333	-2.74767
Sk Hov 3d F12	0.688667	-0.0926667
Sk Hov 3d F13	0.643667	-0.752667
Sk Hov 3d F14	-0.816333	0.00733333
Sk Hov 3d F15	1.79367	2.25733
Sk Hov 7d F1	0.293667	0.642333
Sk Hov 7d F2	0.543667	-1.59267
Sk Hov 7d F3	-0.406333	-0.952667
Sk Hov 7d F4	0.168667	-1.11767
Sk Hov 7d F5	-0.651333	-2.40767
Sk Hov 7d F6	-0.216333	1.22233
Sk Hov 7d F7	-0.321333	0.682333
Sk Hov 7d F8	0.708667	0.532333
Sk Hov 7d F9	0.483667	1.36733
Sk Hov 7d F10	0.833667	-0.947667
Sk Hov 7d F11	0.388667	-0.712667
Sk Hov 7d F12	0.503667	0.127333
Sk Hov 7d F13	-0.426333	1.36233
Sk Hov 7d F14	-0.161333	-0.337667
Sk Hov 7d F15	0.898667	0.0273333
Sk Hov 14d F1	-0.776333	-1.00767
Sk Hov 14d F2	0.173667	1.18733
Sk Hov 14d F3	-0.151333	0.942333
Sk Hov 14d F4	1.00367	1.56233
Sk Hov 14d F5	-1.24133	1.33733
Sk Hov 14d F6	0.263667	1.26233
Sk Hov 14d F7	0.598667	0.212333
Sk Hov 14d F8	1.24367	1.93733
Sk Hov 14d F9	1.30367	0.402333
Sk Hov 14d F10	0.173667	-1.54267
Sk Hov 14d F11	1.52867	-1.23767
Sk Hov 14d F12	0.873667	2.16733
Sk Hov 14d F13	0.0436667	1.14233
Sk Hov 14d F14	0.813667	-0.682667
Sk Hov 14d F15	0.553667	1.39733
Pfaffel values
sample	MUC5	MMP9
Sk Hov 0d F1	0.905216	1.13892
Sk Hov 0d F2	3.27463	1.80584
Sk Hov 0d F3	0.426712	0.488919
Sk Hov 0d F4	0.662657	0.15525
Sk Hov 0d F5	0.503943	4.70002
Sk Hov 0d F6	3.77463	0.488919
Sk Hov 0d F7	0.658079	6.7163
Sk Hov 0d F8	0.222416	0.156873
Sk Hov 0d F9	1.92697	0.845377
Sk Hov 0d F10	0.973554	1.8566
Sk Hov 0d F11	0.801811	0.460945
Sk Hov 0d F12	2.07964	0.34333
Sk Hov 0d F13	0.758559	1.66748
Sk Hov 0d F14	1.56519	1.51327
Sk Hov 0d F15	1.15375	4.22124
Sk Hov 3d F1	1.00092	3.24376
Sk Hov 3d F2	1.15776	2.88319
Sk Hov 3d F3	3.00285	0.445244
Sk Hov 3d F4	1.33916	3.59918
Sk Hov 3d F5	1.24516	2.15497
Sk Hov 3d F6	2.12334	0.649619
Sk Hov 3d F7	0.518111	0.579414
Sk Hov 3d F8	1.20692	0.713342
Sk Hov 3d F9	1.58703	0.456177
Sk Hov 3d F10	1.28907	2.26211
Sk Hov 3d F11	1.60919	6.7163
Sk Hov 3d F12	0.620427	1.06634
Sk Hov 3d F13	0.640084	1.6849
Sk Hov 3d F14	1.76092	0.99493
Sk Hov 3d F15	0.288438	0.209158
Sk Hov 7d F1	0.815826	0.640676
Sk Hov 7d F2	0.686025	3.01606
Sk Hov 7d F3	1.32531	1.93545
Sk Hov 7d F4	0.889665	2.16996
Sk Hov 7d F5	1.57062	5.30615
Sk Hov 7d F6	1.16178	0.428589
Sk Hov 7d F7	1.24948	0.623157
Sk Hov 7d F8	0.611885	0.691436
Sk Hov 7d F9	0.715158	0.387607
Sk Hov 7d F10	0.561101	1.92875
Sk Hov 7d F11	0.763835	1.63883
Sk Hov 7d F12	0.705312	0.915522
Sk Hov 7d F13	1.34381	0.388953
Sk Hov 7d F14	1.11832	1.26371
Sk Hov 7d F15	0.536382	0.981232
Sk Hov 14d F1	1.71277	2.01066
Sk Hov 14d F2	0.886587	0.439114
Sk Hov 14d F3	1.1106	0.520391
Sk Hov 14d F4	0.498731	0.338603
Sk Hov 14d F5	2.36417	0.395751
Sk Hov 14d F6	0.832968	0.416869
Sk Hov 14d F7	0.660364	0.86314
Sk Hov 14d F8	0.422298	0.261099
Sk Hov 14d F9	0.405095	0.756634
Sk Hov 14d F10	0.886587	2.91333
Sk Hov 14d F11	0.346598	2.35817
Sk Hov 14d F12	0.545758	0.222622
Sk Hov 14d F13	0.970186	0.453026
Sk Hov 14d F14	0.568934	1.6051
Sk Hov 14d F15	0.681286	0.37963
log2 Pfaffel values
sample	MUC5	MMP9
Sk Hov 0d F1	-0.143667	0.187667
Sk Hov 0d F2	1.71133	0.852667
Sk Hov 0d F3	-1.22867	-1.03233
Sk Hov 0d F4	-0.593667	-2.68733
Sk Hov 0d F5	-0.988667	2.23267
Sk Hov 0d F6	1.91633	-1.03233
Sk Hov 0d F7	-0.603667	2.74767
Sk Hov 0d F8	-2.16867	-2.67233
Sk Hov 0d F9	0.946333	-0.242333
Sk Hov 0d F10	-0.0386667	0.892667
Sk Hov 0d F11	-0.318667	-1.11733
Sk Hov 0d F12	1.05633	-1.54233
Sk Hov 0d F13	-0.398667	0.737667
Sk Hov 0d F14	0.646333	0.597667
Sk Hov 0d F15	0.206333	2.07767
Sk Hov 3d F1	0.00133333	1.69767
Sk Hov 3d F2	0.211333	1.52767
Sk Hov 3d F3	1.58633	-1.16733
Sk Hov 3d F4	0.421333	1.84767
Sk Hov 3d F5	0.316333	1.10767
Sk Hov 3d F6	1.08633	-0.622333
Sk Hov 3d F7	-0.948667	-0.787333
Sk Hov 3d F8	0.271333	-0.487333
Sk Hov 3d F9	0.666333	-1.13233
Sk Hov 3d F10	0.366333	1.17767
Sk Hov 3d F11	0.686333	2.74767
Sk Hov 3d F12	-0.688667	0.0926667
Sk Hov 3d F13	-0.643667	0.752667
Sk Hov 3d F14	0.816333	-0.00733333
Sk Hov 3d F15	-1.79367	-2.25733
Sk Hov 7d F1	-0.293667	-0.642333
Sk Hov 7d F2	-0.543667	1.59267
Sk Hov 7d F3	0.406333	0.952667
Sk Hov 7d F4	-0.168667	1.11767
Sk Hov 7d F5	0.651333	2.40767
Sk Hov 7d F6	0.216333	-1.22233
Sk Hov 7d F7	0.321333	-0.682333
Sk Hov 7d F8	-0.708667	-0.532333
Sk Hov 7d F9	-0.483667	-1.36733
Sk Hov 7d F10	-0.833667	0.947667
Sk Hov 7d F11	-0.388667	0.712667
Sk Hov 7d F12	-0.503667	-0.127333
Sk Hov 7d F13	0.426333	-1.36233
Sk Hov 7d F14	0.161333	0.337667
Sk Hov 7d F15	-0.898667	-0.0273333
Sk Hov 14d F1	0.776333	1.00767
Sk Hov 14d F2	-0.173667	-1.18733
Sk Hov 14d F3	0.151333	-0.942333
Sk Hov 14d F4	-1.00367	-1.56233
Sk Hov 14d F5	1.24133	-1.33733
Sk Hov 14d F6	-0.263667	-1.26233
Sk Hov 14d F7	-0.598667	-0.212333
Sk Hov 14d F8	-1.24367	-1.93733
Sk Hov 14d F9	-1.30367	-0.402333
Sk Hov 14d F10	-0.173667	1.54267
Sk Hov 14d F11	-1.52867	1.23767
Sk Hov 14d F12	-0.873667	-2.16733
Sk Hov 14d F13	-0.0436667	-1.14233
Sk Hov 14d F14	-0.813667	0.682667
Sk Hov 14d F15	-0.553667	-1.39733

## Sheet: For R_Heart
group	day	fish	IERG2	JUNB	TNF1a	iNOS	Ryr1
Hov	0	F1	-1.107	-1.02933	-0.316333	4.78133	0.05
Hov	0	F2	-1.202	-0.864333	-1.72133	2.00633	0.73
Hov	0	F3	0.838	1.86567	1.85367	0.331333	-1.22
Hov	0	F4	0.703	1.98567	0.668667	1.20633	-0.44
Hov	0	F5	-1.637	-1.09933	-2.11633	-0.763667	0.11
Hov	0	F6	-0.602	-0.649333	-0.746333	0.141333	1.065
Hov	0	F7	1.758	2.57067	1.61867	-3.26867	1.06
Hov	0	F8	0.208	-0.0593333	0.0736667	3.62133	0.575
Hov	0	F9	0.668	1.94567	0.423667	0.461333	0.585
Hov	0	F10	-0.167	-0.204333	1.62867	0.821333	-0.3
Hov	0	F11	-0.077	-0.719333	0.553667	-0.943667	0.47
Hov	0	F12	-0.012	-1.16933	-0.181333	-1.12867	0.575
Hov	0	F13	-0.962	-1.25933	0.0386667	-5.20367	0.115
Hov	0	F14	0.933	-0.449333	-0.561333	-2.60367	-1.67
Hov	0	F15	0.658	-0.864333	-1.21633	0.541333	-1.705
Hov	3	F1	-0.882	-0.434333	1.33867	3.65133	1.335
Hov	3	F2	-0.617	-0.134333	0.883667	-3.52867	-0.225
Hov	3	F3	-1.367	-0.359333	0.218667	-0.453667	1.585
Hov	3	F4	-0.282	-0.354333	0.788667	-2.36367	0.54
Hov	3	F5	-1.567	-1.36933	-0.446333	-2.19367	-1.595
Hov	3	F6	-1.032	-1.11933	-0.366333	-1.02367	-0.335
Hov	3	F7	-0.437	-0.984333	0.173667	-2.45367	-0.355
Hov	3	F8	0.728	0.990667	0.678667	-0.383667	0.675
Hov	3	F9	1.388	2.65067	2.77367	-2.91867	-1.305
Hov	3	F10	-0.682	-1.01933	-0.141333	1.84633	-0.025
Hov	3	F11	-0.597	-0.624333	0.0786667	0.371333	2.01
Hov	3	F12	0.618	0.750667	1.51867	0.141333	-0.41
Hov	3	F13	-0.297	-0.879333	-0.241333	-0.523667	-2.465
Hov	3	F14	-0.562	-1.20433	-0.406333	0.826333	0.905
Hov	3	F15	-0.022	-1.01433	-1.61633	-1.26867	0.365
Hov	7	F1	-2.452	-1.82933	-0.536333	-1.47867	0.01
Hov	7	F2	-1.452	-0.464333	-0.171333	-0.188667	1.25
Hov	7	F3	-2.042	-1.33933	-0.576333	-2.03367	0.955
Hov	7	F4	0.948	1.49567	1.49867	-1.39867	0.88
Hov	7	F5	-0.862	0.220667	1.49367	0.736333	-0.665
Hov	7	F6	-1.637	-1.24433	-0.481333	-2.16367	0.53
Hov	7	F7	-0.757	-0.614333	0.193667	-1.98367	1.255
Hov	7	F8	-0.877	-0.669333	0.208667	4.48133	0.995
Hov	7	F9	-0.817	-0.644333	-1.25133	0.146333	-1.13
Hov	7	F10	-0.747	-0.994333	-1.01633	-4.56367	0.08
Hov	7	F11	-1.277	-0.749333	0.0636667	0.0513333	0.75
Hov	7	F12	-1.282	-0.804333	-0.651333	0.171333	-1.035
Hov	7	F13	-0.467	-0.489333	-1.03633	-4.48367	-0.675
Hov	7	F14	-1.232	-0.729333	-0.941333	-3.06367	-0.18
Hov	7	F15	-1.417	-1.32433	-1.04633	-0.203667	-0.385
Hov	14	F1	0.943	-0.189333	-1.30133	-0.478667	0.16
Hov	14	F2	0.213	0.540667	0.0136667	0.646333	0.675
Hov	14	F3	0.953	0.415667	0.538667	-0.578667	-0.08
Hov	14	F4	-0.147	0.165667	-0.146333	-0.758667	-2.66
Hov	14	F5	1.048	1.39067	0.453667	-0.618667	0.545
Hov	14	F6	0.908	0.910667	0.738667	1.35133	-0.42
Hov	14	F7	1.778	1.50567	1.18867	-6.02867	1.075
Hov	14	F8	-0.197	-0.649333	0.208667	1.66133	-0.575
Hov	14	F9	1.083	0.115667	0.383667	-0.0336667	0.62
Hov	14	F10	-1.137	-1.45933	-1.06133	-0.898667	0.115
Hov	14	F11	1.813	2.21067	1.76367	-0.388667	0.905
Hov	14	F12	0.903	0.185667	0.0136667	2.27633	0.715
Hov	14	F13	1.098	1.11567	0.308667	-4.24867	-1.5
Hov	14	F14	-0.382	-0.419333	1.13367	-1.31367	-0.68
Hov	14	F15	1.613	0.720667	1.06367	-3.22367	-0.07
Stress	0	F1	1.643	1.15067	1.34367	-3.53367	1.41
Stress	0	F2	1.473	0.840667	0.268667	-2.69867	1.31
Stress	0	F3	1.688	2.31067	2.01867	0.781333	0.315
Stress	0	F4	1.703	1.42567	1.39867	2.41133	-0.375
Stress	0	F5	0.618	-0.634333	0.468667	-2.15867	-0.295
Stress	0	F6	0.428	0.315667	1.97867	0.356333	-0.28
Stress	0	F7	1.708	1.30567	0.693667	-3.16867	0.205
Stress	0	F8	0.938	0.270667	1.85367	-5.17367	-1.065
Stress	0	F9	1.808	2.44567	2.71367	4.86133	-0.58
Stress	0	F10	2.958	2.75567	-0.461333	-0.583667	-2.135
Stress	0	F11	2.028	1.92067	-0.141333	-5.53367	-1.96
Stress	0	F12	2.628	2.28067	-0.406333	-3.58867	0.1
Stress	0	F13	1.863	1.05067	-0.156333	-1.69867	-1.005
Stress	0	F14	2.263	1.38567	0.613667	-3.01867	0.84
Stress	0	F15	1.708	1.41567	1.03867	-5.88867	0.685
Stress	14	F1	1.808	1.32067	0.913667	-2.25367	-0.545
Stress	14	F2	2.108	1.90067	1.05367	-2.84867	0.395
Stress	14	F3	1.693	1.02067	0.508667	-0.653667	0.405
Stress	14	F4	2.118	1.07067	0.573667	-0.0986667	1.28
Stress	14	F5	2.663	2.03567	0.00366667	-1.11867	0.22
Stress	14	F6	1.763	2.84567	2.24867	-1.16867	-0.72
Stress	14	F7	2.223	2.78567	1.19367	2.59633	1.17
Stress	14	F8	2.113	1.37567	0.763667	-2.73367	-1.17
Stress	14	F9	1.328	0.480667	-0.241333	-3.07367	1.815
Stress	14	F10	1.958	1.63067	0.473667	0.351333	0.38
Stress	14	F11	1.828	1.10067	-0.401333	-1.03367	-0.375
Stress	14	F12	2.768	2.33567	-0.0513333	-2.38867	0.67
Stress	14	F13	2.318	2.37567	0.973667	-0.868667
Stress	14	F14	2.333	1.96067		-2.35367	-0.545
Stress	14	F15	2.243	1.37067	1.15367	-3.23867	1.11

## Sheet: For R_Skin
group	day	fish	MUC5	MMP9
Hov	0	F1	-0.143667	0.187667
Hov	0	F2	1.71133	0.852667
Hov	0	F3	-1.22867	-1.03233
Hov	0	F4	-0.593667	-2.68733
Hov	0	F5	-0.988667	2.23267
Hov	0	F6	1.91633	-1.03233
Hov	0	F7	-0.603667	2.74767
Hov	0	F8	-2.16867	-2.67233
Hov	0	F9	0.946333	-0.242333
Hov	0	F10	-0.0386667	0.892667
Hov	0	F11	-0.318667	-1.11733
Hov	0	F12	1.05633	-1.54233
Hov	0	F13	-0.398667	0.737667
Hov	0	F14	0.646333	0.597667
Hov	0	F15	0.206333	2.07767
Hov	3	F1	0.00133333	1.69767
Hov	3	F2	0.211333	1.52767
Hov	3	F3	1.58633	-1.16733
Hov	3	F4	0.421333	1.84767
Hov	3	F5	0.316333	1.10767
Hov	3	F6	1.08633	-0.622333
Hov	3	F7	-0.948667	-0.787333
Hov	3	F8	0.271333	-0.487333
Hov	3	F9	0.666333	-1.13233
Hov	3	F10	0.366333	1.17767
Hov	3	F11	0.686333	2.74767
Hov	3	F12	-0.688667	0.0926667
Hov	3	F13	-0.643667	0.752667
Hov	3	F14	0.816333	-0.00733333
Hov	3	F15	-1.79367	-2.25733
Hov	7	F1	-0.293667	-0.642333
Hov	7	F2	-0.543667	1.59267
Hov	7	F3	0.406333	0.952667
Hov	7	F4	-0.168667	1.11767
Hov	7	F5	0.651333	2.40767
Hov	7	F6	0.216333	-1.22233
Hov	7	F7	0.321333	-0.682333
Hov	7	F8	-0.708667	-0.532333
Hov	7	F9	-0.483667	-1.36733
Hov	7	F10	-0.833667	0.947667
Hov	7	F11	-0.388667	0.712667
Hov	7	F12	-0.503667	-0.127333
Hov	7	F13	0.426333	-1.36233
Hov	7	F14	0.161333	0.337667
Hov	7	F15	-0.898667	-0.0273333
Hov	14	F1	0.776333	1.00767
Hov	14	F2	-0.173667	-1.18733
Hov	14	F3	0.151333	-0.942333
Hov	14	F4	-1.00367	-1.56233
Hov	14	F5	1.24133	-1.33733
Hov	14	F6	-0.263667	-1.26233
Hov	14	F7	-0.598667	-0.212333
Hov	14	F8	-1.24367	-1.93733
Hov	14	F9	-1.30367	-0.402333
Hov	14	F10	-0.173667	1.54267
Hov	14	F11	-1.52867	1.23767
Hov	14	F12	-0.873667	-2.16733
Hov	14	F13	-0.0436667	-1.14233
Hov	14	F14	-0.813667	0.682667
Hov	14	F15	-0.553667	-1.39733
			0.172339

## Sheet: t-test
heart						skin
IERG2						MUC5
Hov	0	3	7			Hov	0	3	7
3	0.2309	-	-			3	1	-	-
7	0.0041	0.0715	-			7	1	1	-
14	0.0715	0.0041	1.9e-06			14	0.85	0.37	1
IERG2
Stress	0
14	0.061
JUNB						MMP9
Hov	0	3	7			Hov	0	3	7
3	0.781	-	-			3	1	-	-
7	0.333	0.781	-			7	1	1	-
14	0.781	0.24	0.032			14	0.92	0.45	0.7
JUNB
Stress	0
14	0.24
TNF1a
Hov	0	3	7
3	1	-	-
7	1	0.49	-
14	1	1	0.49
TNF1a
Stress	0
14	0.48
iNOS
Hov	0	3	7
3	1	-	-
7	1	1	-
14	1	1	1
iNOS
Stress	0
14	0.56
Ryr1
Hov	0	3	7
3	1	-	-
7	1	1	-
14	1	1	1
Ryr1
Stress	0
14	0.2
